# Supplementary material
Source: PubMed Central journal article supplement (PMC6171036)
Supplement: mmc1.pdf [file mmc1.pdf]

## **Supplemental Information**

### **A Nanostructured Lipid Carrier for Delivery of a Replicating Viral RNA Provides Single, Low-Dose Protection against Zika**

**Jesse H. Erasmus, Amit P. Khandhar, Jeff Guderian, Brian Granger, Jacob Archer, Michelle Archer, Emily Gage, Jasmine Fuerte-Stone, Elise Larson, Susan Lin, Ryan Kramer, Rhea N. Coler, Christopher B. Fox, Dan T. Stinchcomb, Steven G. Reed, and Neal Van Hoven**

SUPPLEMENTAL FIGURES

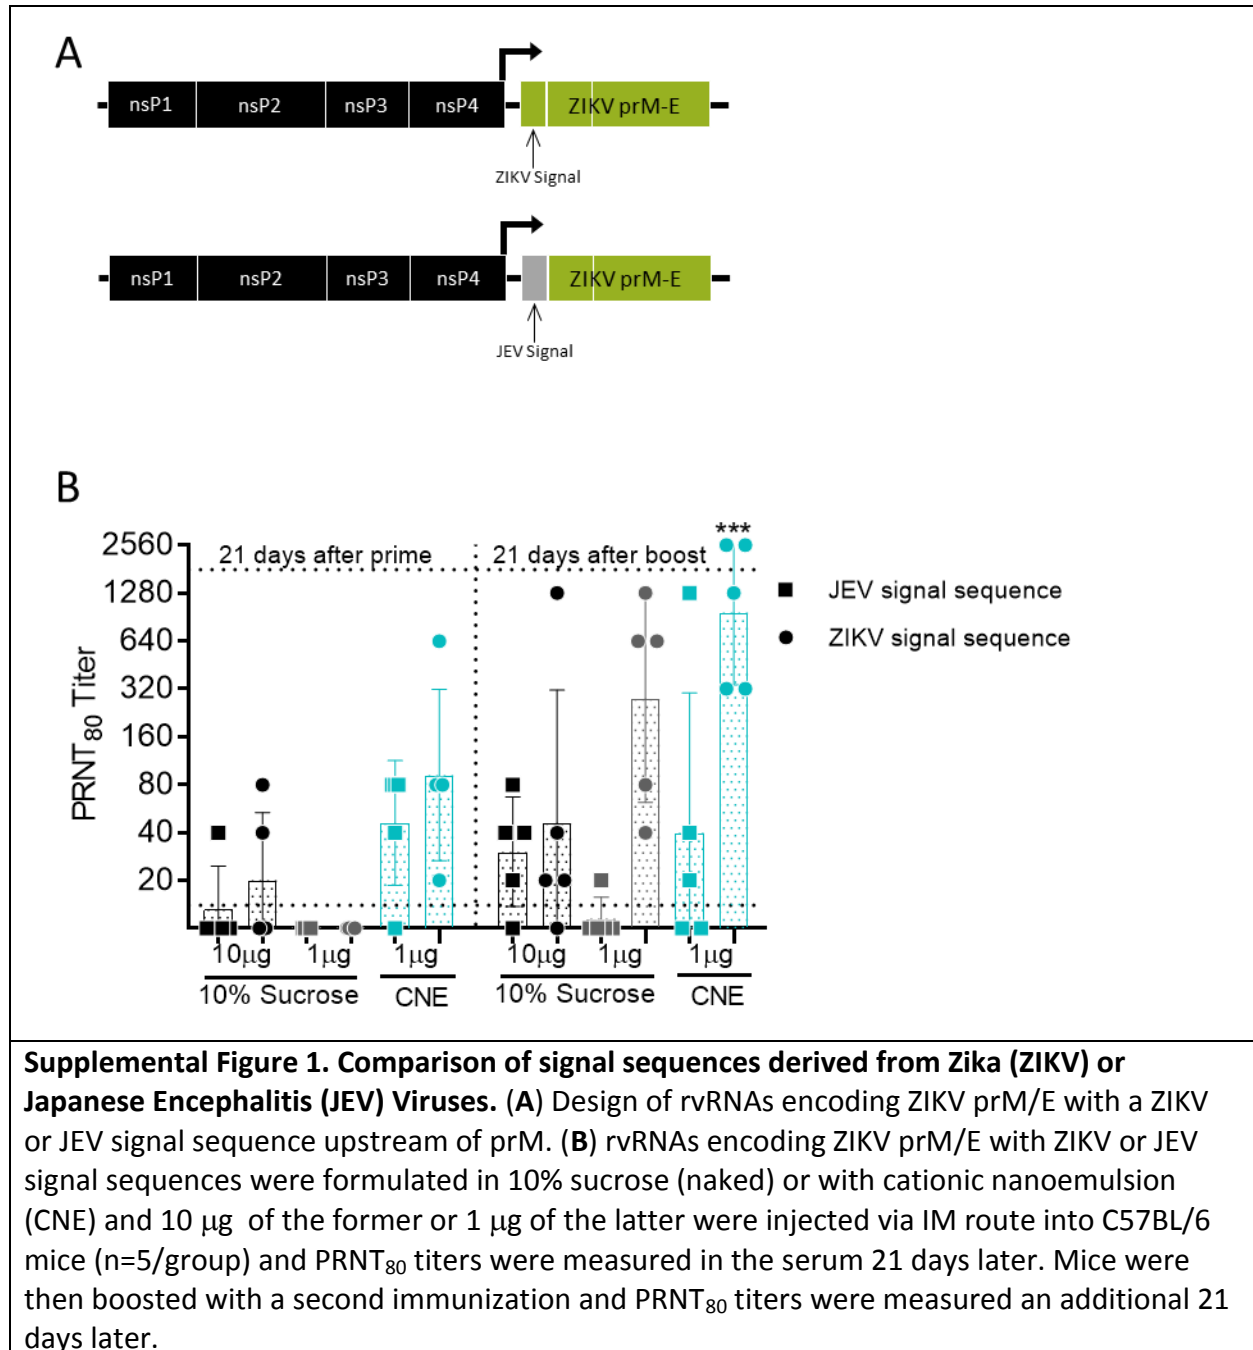

## SUPPLEMENTAL FIGURES

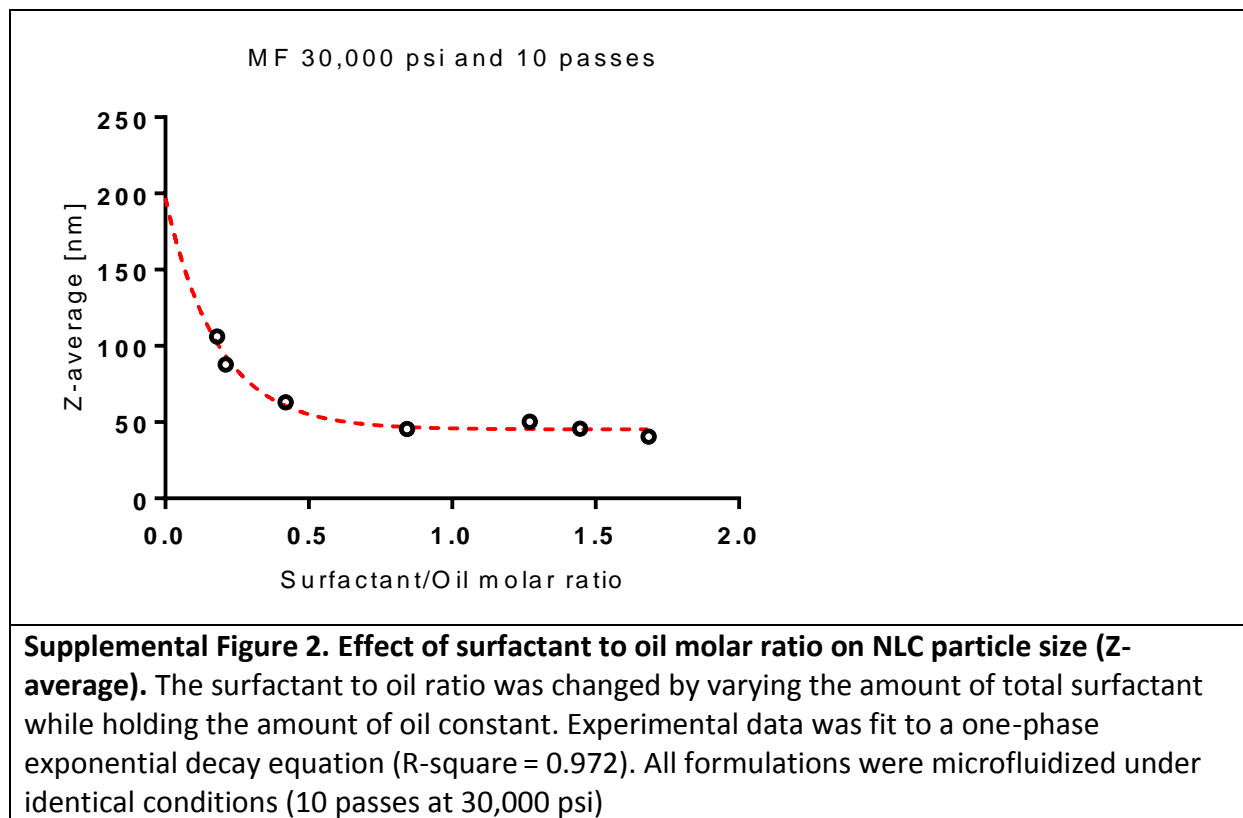

**SUPPLEMENTAL FIGURES**

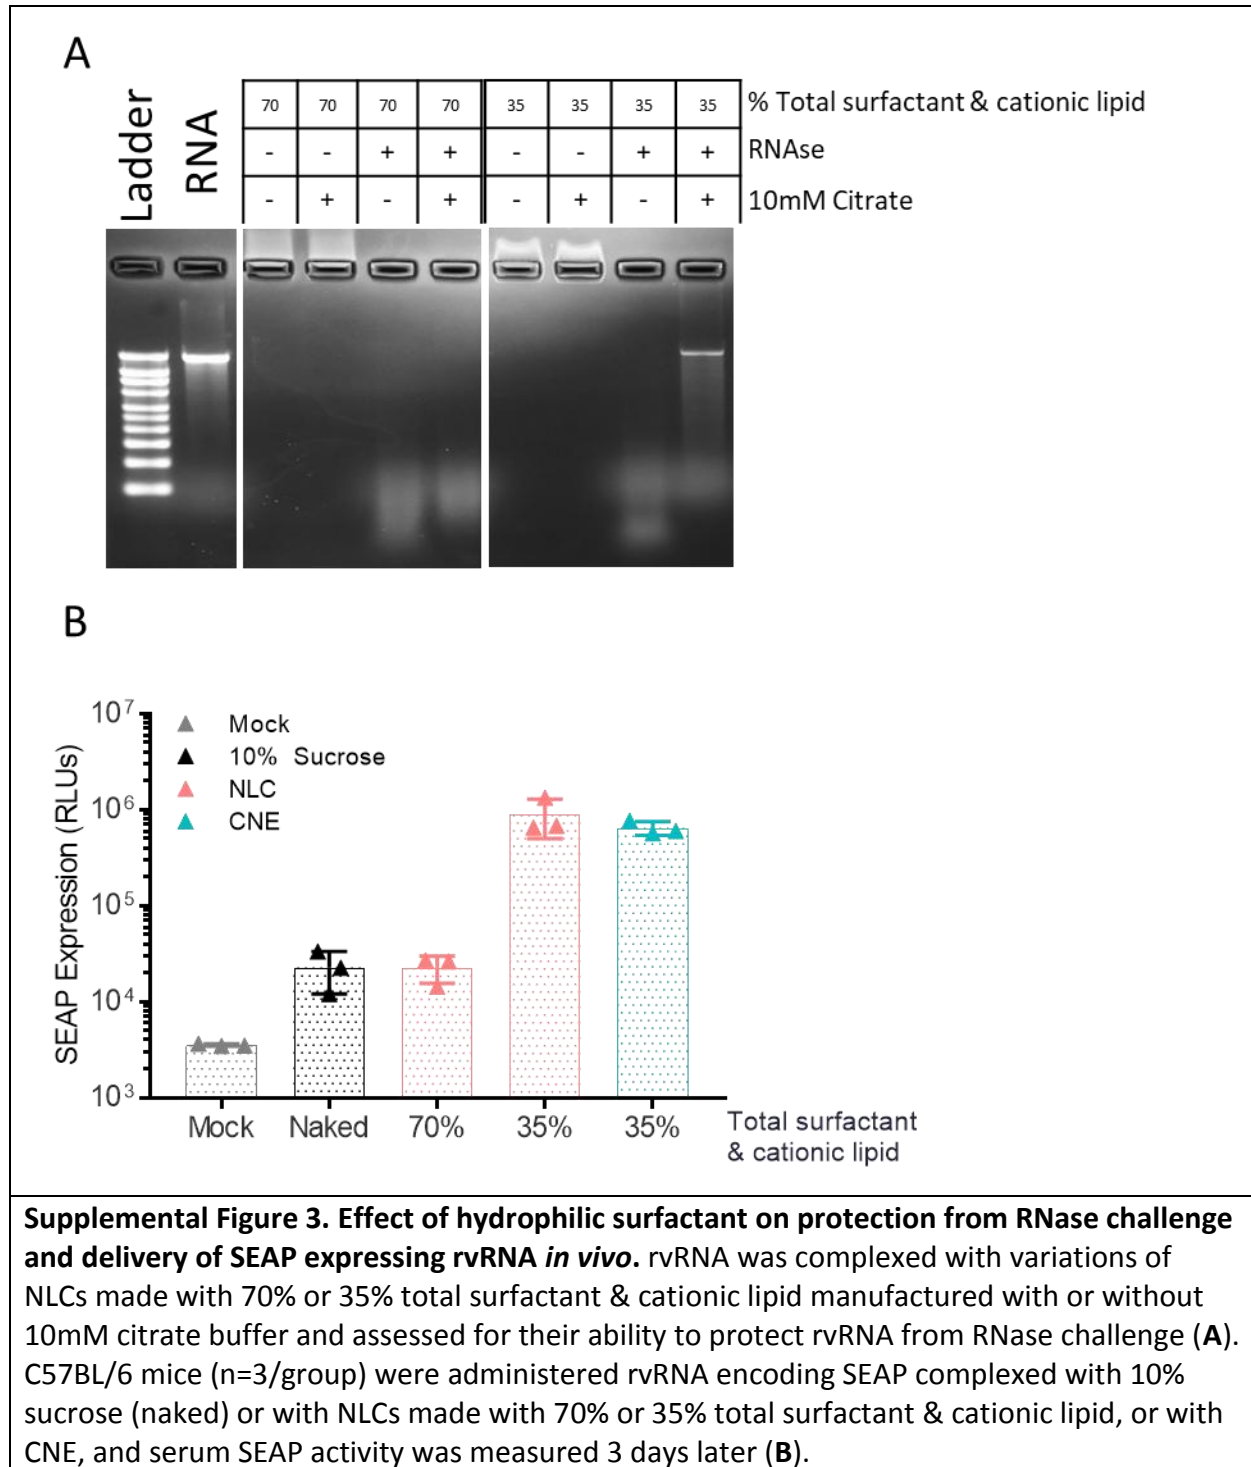

**SUPPLEMENTAL FIGURES**

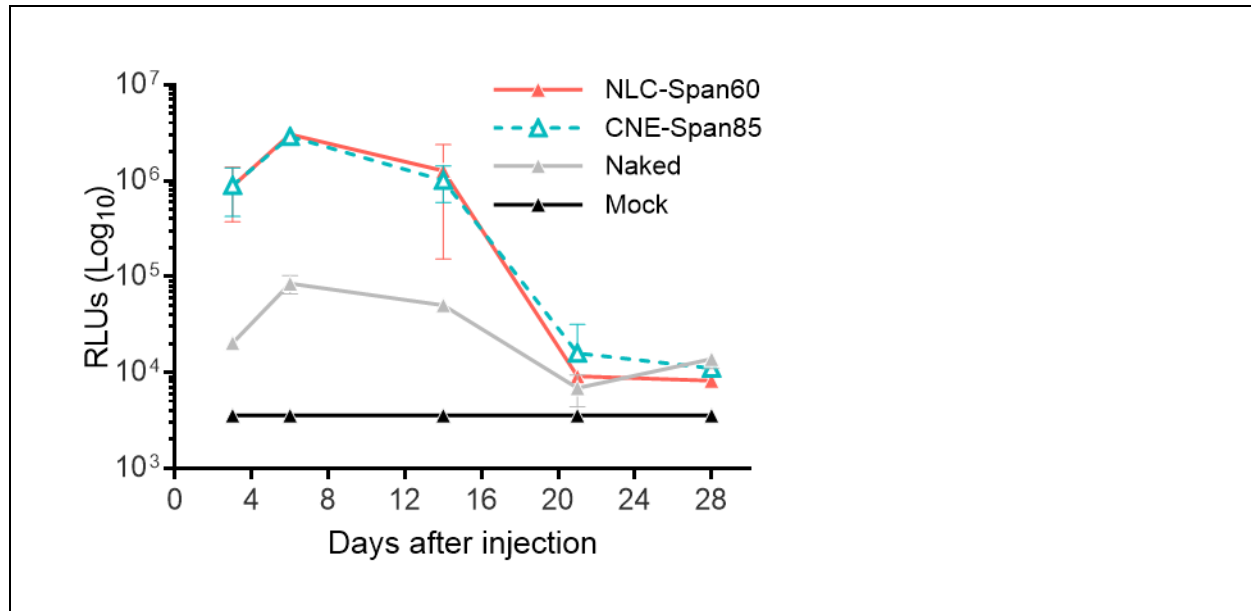

**Supplemental Figure 4. Kinetics of protein expression following *in vivo* delivery of rvRNA formulated with NLC<sub>v1</sub> or CNE.** rvRNA encoding SEAP was formulated with either NLC<sub>v1</sub>, CNE, or 10% sucrose (naked) and 100ng was administered via the IM route to C57BL/6 mice (n=3/group). Mice mock injected with 10% sucrose alone were used as a negative control. Mice were bled on days 3, 7, 14, 21, and 28 and serum SEAP activity was measured by SEAP assay.

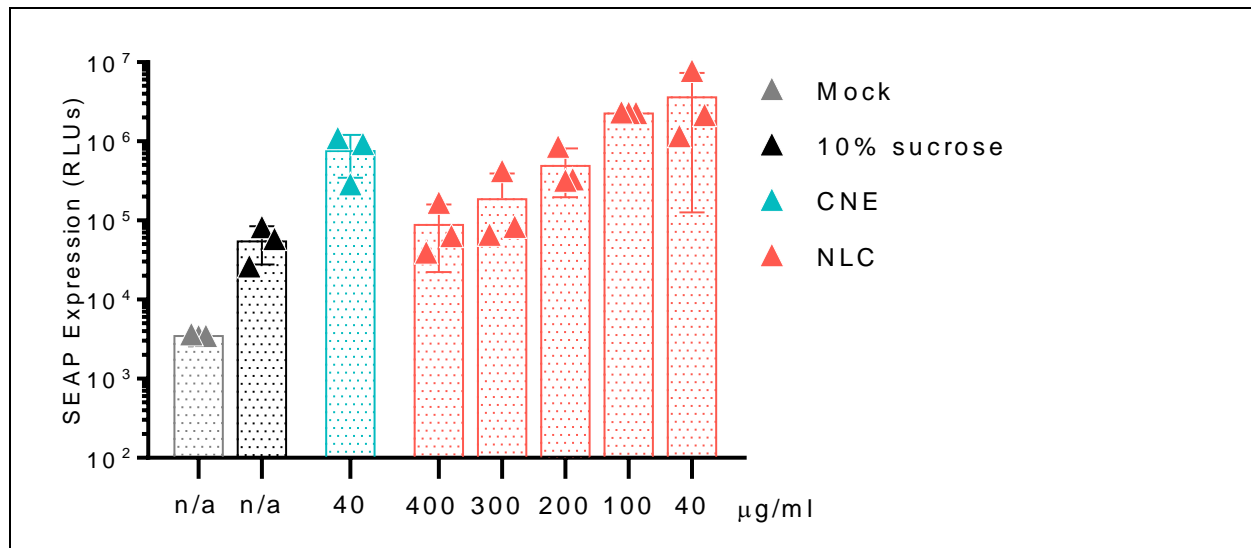

**Supplemental Figure 5. Optimization of rvRNA loading capacity of NLC<sub>v1</sub>.** rvRNA encoding SEAP was diluted in 10% sucrose to final concentrations of 400, 300, 200, 100, and 40 µg/ml and complexed 1:1 with NLC<sub>v1</sub> by gentle pipetting. CNE was complexed 1:1 with 40 µg/ml of rvRNA. Complexed or unformulated rvRNA was then diluted in 10% sucrose for dosing such that each 50 µl injection IM resulted in a 100ng dose. Mice were then bled 3 days later and serum SEAP activity was measured by SEAP assay and compared to mock-injected mice.

## SUPPLEMENTAL FIGURES

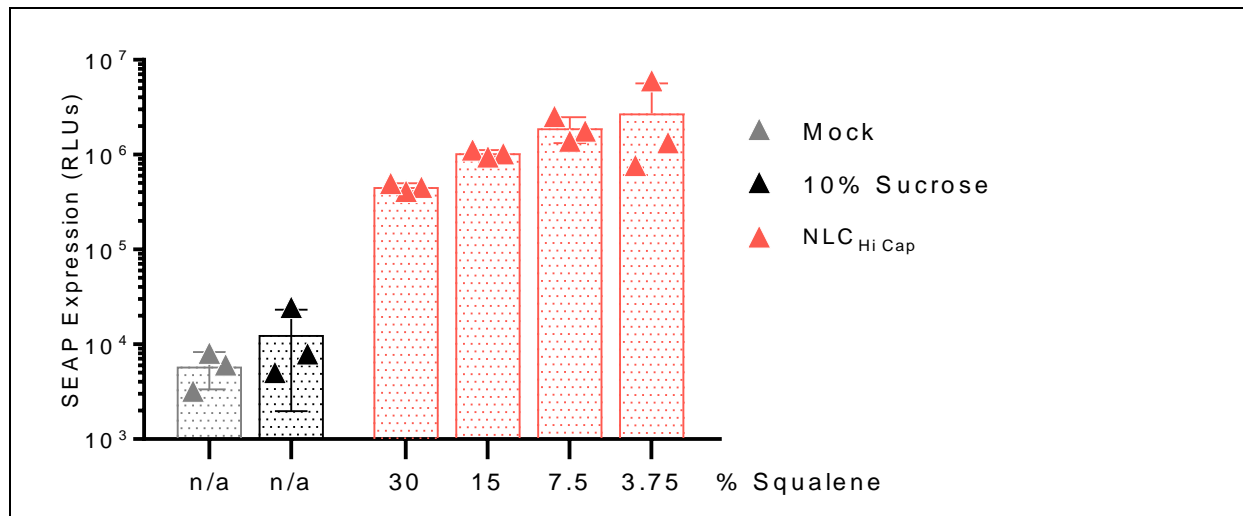

**Supplemental Figure 6. Effect of decreasing squalene concentration in high-capacity NLCs on serum SEAP activity.** High-capacity NLCs (containing 3% w/v DOTAP) manufactured with 30, 15, 7.5, and 3.75% w/v squalene were complexed 1:1 with rvRNA encoding SEAP at an N:P of 37 and 100ng was administered via IM route in C57BL/6 mice (n=3/group) and serum SEAP activity was measured 3 days later and compared to unformulated rvRNA- or mock-injected mice.

SUPPLEMENTAL FIGURES

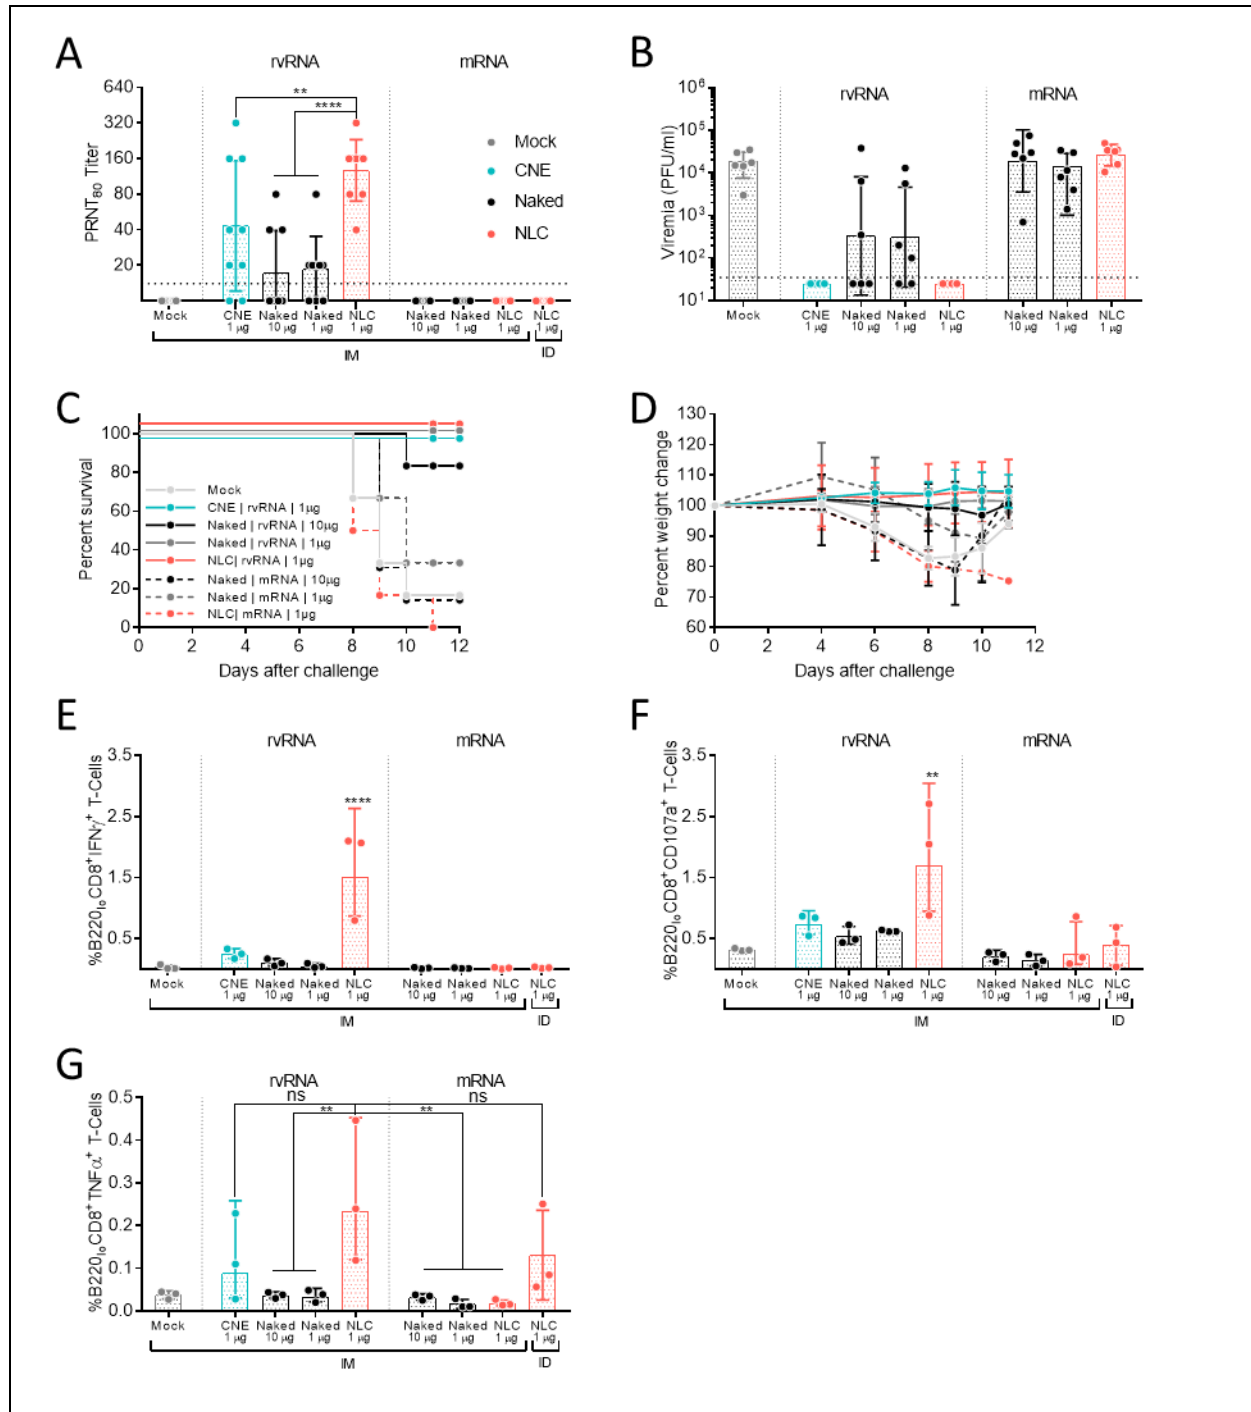

**Supplemental Figure 7. Immunogenicity and efficacy of NLC<sub>v1</sub>/rvRNA complexes in C57BL/6 mice.** NLC<sub>v1</sub> was complexed with rvRNA or mRNA encoding ZIKV prM/E at an N:P of 50 and a single 1 μg dose was administered to C57BL/6 mice via IM injection (n=9/group) and 14 days later, bled to assess neutralizing antibody titers by PRNT<sub>80</sub> (A) compared to mock vaccinated mice or 10 or 1 μg naked rvRNA or mRNA (n=9/group), or 1 μg rvRNA formulated with CNE at an N:P of 50. Data are presented as individual values as well as mean ± S.D. Thirty days after immunization, 6 mice per group were challenged with 5 log<sub>10</sub> PFU of ZIKV Dakar strain 41525

## SUPPLEMENTAL FIGURES

following antibody blockade of type I interferon as described (49) and bled 4 days later to quantify viremia by plaque assay (B). Mice were monitored daily for survival (C) and weight loss (D). The remaining 3 mice per group were administered a second immunization on day 30 to assess post-boost CD8<sup>+</sup> T-cell responses. Fourteen days later, mice were euthanized and splenocytes were isolated, stained, and %B220<sup>+</sup>CD8<sup>+</sup> T cells that were IFN $\gamma$ <sup>+</sup> (E), CD107a<sup>+</sup> (F), or TNF $\alpha$ <sup>+</sup> (G) were quantified by flow cytometry.

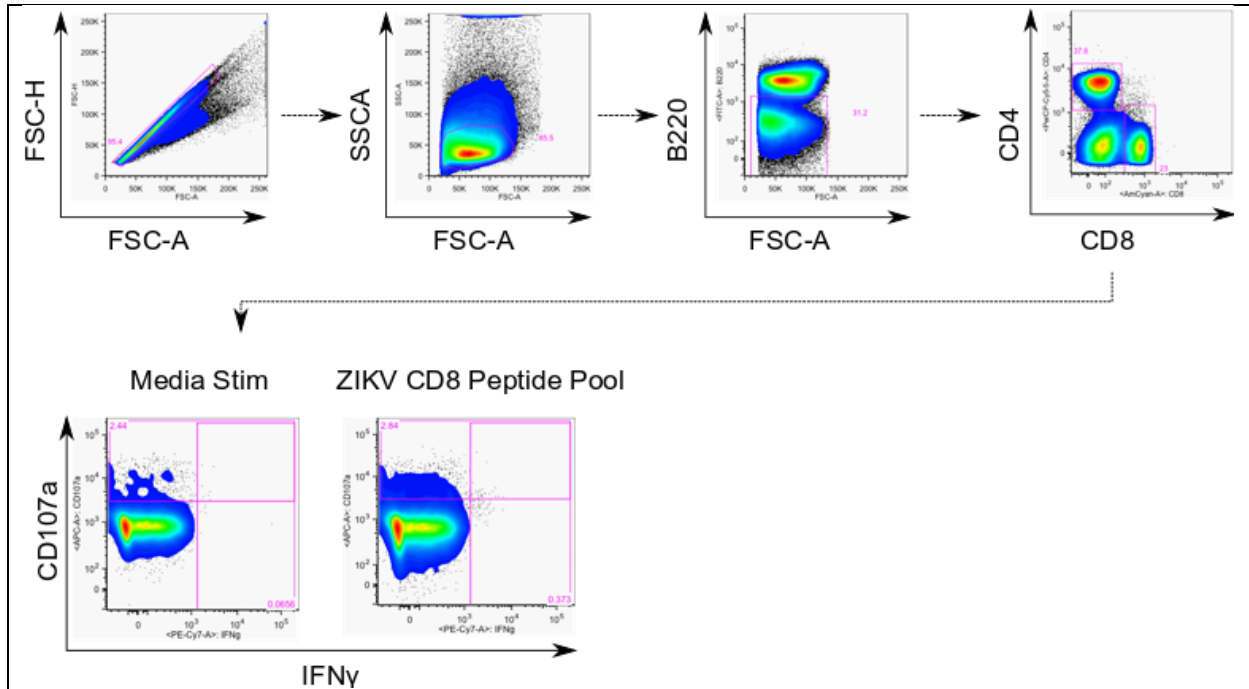

**Supplemental Figure 8. Flow cytometry gating strategy.**

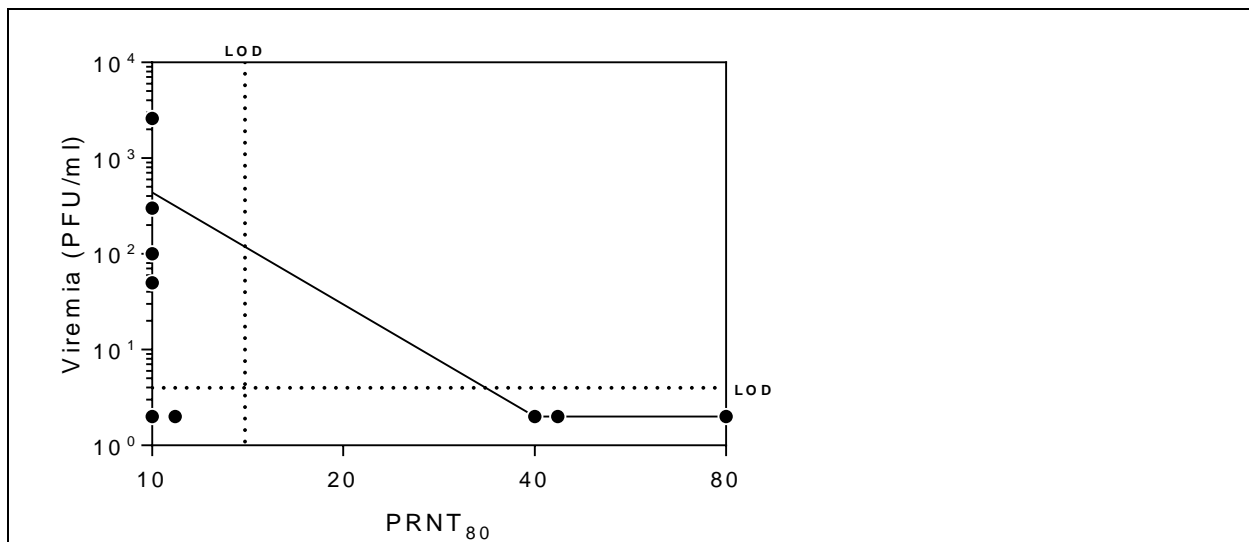

**Supplemental Figure 9. Correlation between day 14 PRNT<sub>80</sub> titer and post-challenge viremia in mice vaccinated with 3ng of ZIKV rvRNA formulated in NLC<sub>v2</sub>.**
